# Supplementary material for: Alterations in Small Intestine and Liver Morphology, Immunolocalization of Leptin, Ghrelin and Nesfatin-1 as Well as Immunoexpression of Tight Junction Proteins in Intestinal Mucosa after Gastrectomy in Rat Model
Source: PubMed Central journal article supplement (PMC7828391; doi:10.3390/jcm10020272), 2021-01-13
Supplement: jcm-10-00272-s001.pdf [file jcm-10-00272-s001.pdf]

## Supplementary material

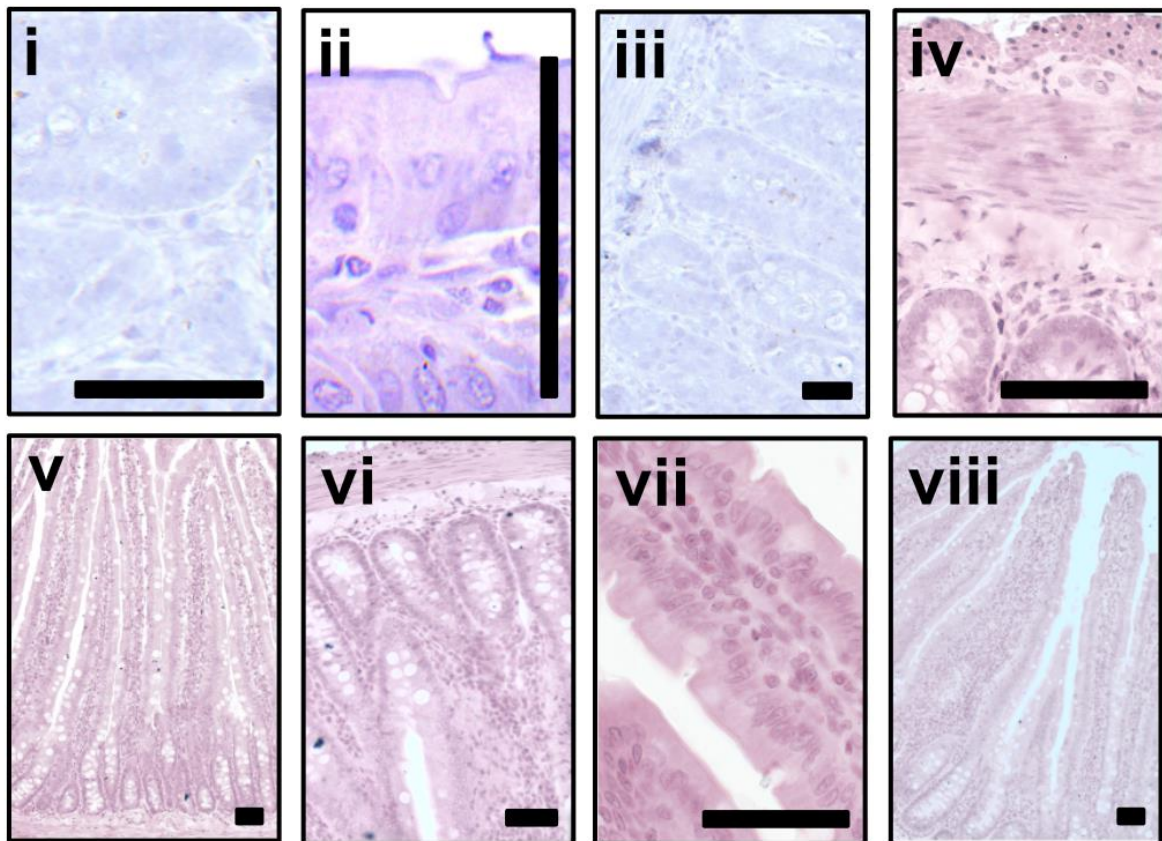

**Figure S1.** Representative pictures of the antibody control for all immunohistochemical reactions: (i) crypts in jejunum; (ii) enterocytes in jejunum; (iii) crypts in duodenum; (iv) plexus of enteric nervous system in duodenum; (v) villi in duodenum; (vi) crypts in duodenum; (vii) duodenal villus; (viii) duodenal villi. (i, ii, iii) Sections developed in 3,3'-diaminobenzidine tetrahydrochloride (DAB); counterstaining performed with Mayer's hematoxylin. (iv, v, v, vii, viii) Sections developed in 3,3'-diaminobenzidine tetrahydrochloride (DAB) with metal enhancer; counterstaining performed with Nuclear Fast Red (NFR). All the scale bars represent 50  $\mu\text{m}$ .

## Statistical analysis

Sample size ( $n = 6$  per group) was calculated for a two-sided t-test of two groups with an  $\alpha$  of 0.05 and power at 0.8, with standardized effect size of 1.8 [S1]. Available literature data on gastrectomy-subjected rats show that for these assumptions  $n = 6$  sample size has a power of 80% to detect a change of 5-17% in villus height [S2-S5], a change of 6% in villus number [S2], and a change of 10-11% in crypt depth [S2, S4], assuming a 5% significance level [S6].

The results included in Table S1 are expressed as mean  $\pm$  standard error and median (with Q1 and Q3), where Q1 and Q3 are the 25th and 75th percentile, respectively. Before the comparison of the means, the normality and homogeneity of variance was tested for all data with Shapiro-Wilk's test and Levene's test, respectively. The group comparison was performed by unpaired two-tailed Student's t-test (normally distributed data with equal variances), unpaired t-test with Welch's correction (normally distributed data with unequal variances) or the Mann Whitney test (for pairwise comparisons with at least one non-normally distributed dataset). Effect size for Student's and Welch's t-test was calculated using Cohen's  $d$ ; for Mann-Whitney's test Cohen's  $r$  was determined [S7].

## Supplementary References

- S1. Festing, M.F.W. On determining sample size in experiments involving laboratory animals. *Lab. Anim.* **2018**, *52*, 341–350.
- S2. Onishi, S.; Kaji, T.; Yamada, W.; Nakamee, K.; Machigashire, S.; ..., Ieiri, S. Ghrelin stimulates intestinal adaptation following massive small bowel resection in parenterally fed rats. *Peptide* **2018**, *106*, 59–67.
- S3. Stearns, A.T.; Balakrishnan, A.; Tavakkolizadeh, A. Impact of Roux-en-Y gastric bypass surgery on rat intestinal glucose transport. *Am. J. Physiol. Gastrointest. Liver Physiol.* **2009**, *297*, G950–957.
- S4. Deveney, C.W.; Owen, R.L.; Deveney, K.; Reber, H.A.; Way, L.W. Effect of acid secretory capacity and chronic endogenous hypergastrinemia on pancreatic secretion and intestinal morphology in the rat. *Digest. Dis. Sci.* **1983**, *28*, 65–73.
- S5. Li, L.; Wang, X.; Bai, L.; Yu, H.; Huang, X.; Huang, A.; Luo, Y.; Wang, J. The effects of sleeve gastrectomy on glucose metabolism and glucagon-like peptide 1 in Goto-Kakizaki rats. *J. Diabet. Res.* **2018**, *2018*, 1082561.
- S6. Kilkeny, C.; Browne, W.J.; Cuthill, I.C.; Emerson, M.; Altman, D.G. Improving bioscience research reporting: The ARRIVE guidelines for reporting animal research. *PLoS Biol.* **2010**, *8*, e1000412.
- S7. Fritz, C.O.; Morris, P.E.; Richler, J.J. Effect size estimates: Current use, calculations, and interpretation. *J. Exp. Psychol. Gen.* **2012**, *141*, 2–18.

**Table S1.** Descriptive statistics of the data and results of statistical analyses

| Item                                                                           | CONT            |                   | GASTR           |                   | Applied statistical test | p-value | Effect size |
|--------------------------------------------------------------------------------|-----------------|-------------------|-----------------|-------------------|--------------------------|---------|-------------|
|                                                                                | Mean $\pm$ SE   | Median (Q1; Q3)   | Mean $\pm$ SE   | Median (Q1; Q3)   |                          |         |             |
| <b>Table 1.</b> The histomorphometrical parameters of the duodenum and jejunum |                 |                   |                 |                   |                          |         |             |
| <i>Duodenum</i>                                                                |                 |                   |                 |                   |                          |         |             |
| Myenteron longitudinal lamina thickness, $\mu\text{m}$                         | 34.4 $\pm$ 3.61 | 36.9 (30.1; 41.0) | 29.2 $\pm$ 2.47 | 29.5 (24.8; 34.0) | Student's t-test         | 0.262   |             |
| Myenteron transversal lamina thickness, $\mu\text{m}$                          | 52.2 $\pm$ 4.92 | 52.6 (50.2; 61.1) | 46.0 $\pm$ 3.71 | 45.3 (40.3; 46.7) | Student's t-test         | 0.318   |             |
| Submucosa thickness, $\mu\text{m}$                                             | 40.3 $\pm$ 3.34 | 41.8 (40.3; 42.6) | 25.4 $\pm$ 3.18 | 27.4 (21.7; 28.8) | Student's t-test         | 0.009   | 1.70        |
| Mucosa thickness, $\mu\text{m}$                                                | 885 $\pm$ 29.8  | 872 (834; 886)    | 825 $\pm$ 27.8  | 846 (755; 877)    | Student's t-test         | 0.171   |             |
| Villus length, $\mu\text{m}$                                                   | 628 $\pm$ 13.9  | 623 (603; 642)    | 622 $\pm$ 21.6  | 618 (598; 654)    | Student's t-test         | 0.820   |             |
| Villus thickness, $\mu\text{m}$                                                | 81.4 $\pm$ 4.20 | 85.5 (74.1; 86.6) | 81.8 $\pm$ 3.18 | 82.6 (74.9; 87.6) | Student's t-test         | 0.941   |             |
| Total number of villi, /mm                                                     | 9.1 $\pm$ 0.61  | 9.1 (8.0; 9.4)    | 8.4 $\pm$ 0.33  | 8.4 (8.0; 9.1)    | Student's t-test         | 0.337   |             |
| Villus epithelium thickness, $\mu\text{m}$                                     | 30.9 $\pm$ 1.92 | 30.9 (28.0; 33.2) | 31.7 $\pm$ 1.80 | 31.7 (28.8; 34.4) | Student's t-test         | 0.767   |             |
| Enterocyte number/100 $\mu\text{m}$ of villus                                  | 13.5 $\pm$ 0.57 | 13.7 (13.0; 14.2) | 14.8 $\pm$ 0.59 | 14.9 (13.9; 15.4) | Student's t-test         | 0.139   |             |
| Total crypts number, /mm                                                       | 13.2 $\pm$ 1.10 | 12.6 (11.9; 15.3) | 11.6 $\pm$ 0.63 | 11.3 (10.9; 11/6) | Mann-Whitney's test      | 0.173   |             |
| Active crypts number, /mm                                                      | 4.4 $\pm$ 0.61  | 4.4 (3.9; 4.8)    | 2.6 $\pm$ 0.29  | 2.8 (2.2; 3.0)    | Student's t-test         | 0.024   | 1.40        |
| Inactive crypts number, /mm                                                    | 8.8 $\pm$ 1.06  | 9.5 (8.3; 10.7)   | 9.0 $\pm$ 0.69  | 8.8 (7.9; 10.1)   | Student's t-test         | 0.878   |             |
| Crypt depth, $\mu\text{m}$                                                     | 168 $\pm$ 11.0  | 163 (143; 196)    | 146 $\pm$ 12.2  | 153 (148; 163)    | Mann-Whitney's test      | 0.575   |             |

|                                                        |                  |                       |                  |                      |                         |        |      |
|--------------------------------------------------------|------------------|-----------------------|------------------|----------------------|-------------------------|--------|------|
| Crypt width, $\mu\text{m}$                             | $52.7 \pm 3.71$  | 53<br>(46; 61)        | $55.3 \pm 3.51$  | 56<br>(49; 62)       | Student's<br>t-test     | 0.622  |      |
| Intestine absorptive surface, $\mu\text{m}^2$          | $4.2 \pm 0.24$   | 3.9<br>(3.8; 4.9)     | $4.9 \pm 0.41$   | 4.7<br>(4.5; 5.5)    | Mann-<br>Whitney's test | 0.378  |      |
| Immature collagen, %                                   | $4.1 \pm 0.90$   | 3.5<br>(2.1; 6.4)     | $7.6 \pm 0.98$   | 7.6<br>(7.1; 9.5)    | Student's<br>t-test     | 0.025  | 1.39 |
| Ki index                                               | $0.61 \pm 0.024$ | 0.62<br>(0.61; 0.65)  | $0.68 \pm 0.020$ | 0.67<br>(0.62; 0.72) | Mann-<br>Whitney's test | 0.093  |      |
| Ki number/0.01 $\text{mm}^2$ of the gland surface      | $9.08 \pm 0.821$ | 9.17<br>(7.13; 10.72) | $8.11 \pm 0.441$ | 8.40<br>(7.48; 8.88) | Student's<br>t-test     | 0.332  |      |
| <i>Jejunum</i>                                         |                  |                       |                  |                      |                         |        |      |
| Myenteron longitudinal lamina thickness, $\mu\text{m}$ | $15.7 \pm 1.88$  | 15.6<br>(11.9; 19.1)  | $27.2 \pm 1.22$  | 27.6<br>(25.0; 29.5) | Student's<br>t-test     | <0.001 | 2.70 |
| Myenteron transversal lamina thickness, $\mu\text{m}$  | $22.7 \pm 1.51$  | 23.8<br>(18.3; 25.2)  | $40.7 \pm 1.55$  | 41.5<br>(38.3; 42.7) | Student's<br>t-test     | <0.001 | 4.44 |
| Submucosa thickness, $\mu\text{m}$                     | $15.4 \pm 3.10$  | 16.4<br>(7.8; 20.6)   | $31.7 \pm 2.16$  | 30.7<br>(30.1; 36.5) | Mann-<br>Whitney's test | 0.008  | 0.76 |
| Mucosa thickness, $\mu\text{m}$                        | $723 \pm 12.7$   | 730<br>(696; 751)     | $825 \pm 27.8$   | 797<br>(782; 846)    | Mann-<br>Whitney's test | 0.005  | 0.81 |
| Villus length, $\mu\text{m}$                           | $492 \pm 24.1$   | 468<br>(447; 536)     | $460 \pm 17.6$   | 451<br>(435; 502)    | Student's<br>t-test     | 0.308  |      |
| Villus thickness, $\mu\text{m}$                        | $76.0 \pm 4.00$  | 77<br>(66; 85)        | $81.3 \pm 5.51$  | 75<br>(73; 95)       | Mann-<br>Whitney's test | 0.810  |      |
| Total number of villi, /mm                             | $9.9 \pm 0.37$   | 10.0<br>(9.0; 10.8)   | $9.1 \pm 0.41$   | 9.5<br>(8.9; 9.7)    | Mann-<br>Whitney's test | 0.298  |      |
| Villus epithelium thickness, $\mu\text{m}$             | $28.9 \pm 2.25$  | 27.3<br>(25.1; 31.9)  | $31.0 \pm 2.74$  | 29.6<br>(28.5; 33.9) | Student's<br>t-test     | 0.566  |      |
| Enterocyte number/100 $\mu\text{m}$ of villus          | $16.2 \pm 0.78$  | 16.8<br>(14.2; 17.4)  | $13.5 \pm 0.73$  | 13.2<br>(12.7; 13.8) | Student's<br>t-test     | 0.030  | 1.33 |
| Total crypts number, /mm                               | $16.9 \pm 1.59$  | 17.5<br>(14.9; 20.1)  | $17.3 \pm 1.35$  | 16.5<br>(14.8; 18.4) | Student's<br>t-test     | 0.852  |      |
| Active crypts number, /mm                              | $5.7 \pm 0.73$   | 5.9<br>(5.1; 7.3)     | $5.4 \pm 0.78$   | 5.7<br>(4.6; 6.9)    | Student's<br>t-test     | 0.785  |      |

|                                                     |              |                      |              |                      |                     |        |      |
|-----------------------------------------------------|--------------|----------------------|--------------|----------------------|---------------------|--------|------|
| Inactive crypts number, /mm                         | 10.3 ± 1.55  | 10.9<br>(9.6; 12.3)  | 11.9 ± 1.63  | 12.7<br>(7.7; 13.6)  | Student's<br>t-test | 0.494  |      |
| Crypt depth, µm                                     | 148 ± 7.8    | 153<br>(127; 162)    | 136 ± 6.9    | 138<br>(126; 151)    | Student's<br>t-test | 0.276  |      |
| Crypt width, µm                                     | 44.3 ± 4.24  | 43.3<br>(36.6; 49.3) | 47.1 ± 3.67  | 46.6<br>(40.4; 51.4) | Student's<br>t-test | 0.629  |      |
| Intestine absorptive surface, µm <sup>2</sup>       | 3.9 ± 0.24   | 3.9<br>(3.6; 4.4)    | 4.0 ± 2.04   | 4.0<br>(3.6; 4.3)    | Student's<br>t-test | 0.760  |      |
| Immature collagen, %                                | 3.5 ± 0.61   | 3.3<br>(2.1; 5.0)    | 10.8 ± 1.08  | 10.3<br>(9.9; 12.8)  | Welch's t-test      | <0.001 | 3.14 |
| Ki index                                            | 0.39 ± 0.053 | 0.39<br>(0.34; 0.51) | 0.56 ± 0.029 | 0.54<br>(0.51; 0.64) | Student's<br>t-test | 0.018  | 1.14 |
| Ki number/0.01 mm <sup>2</sup> of the gland surface | 6.6 ± 0.73   | 6.8<br>(6.1; 7.3)    | 10.1 ± 1.14  | 9.6<br>(7.6; 12.6)   | Student's<br>t-test | 0.028  | 1.36 |

**Figure 4.** Immunohistochemical reactions for Ki-67 and cadherin in the sections of the jejunum

|                                                                          |           |                   |           |                   |                |        |      |
|--------------------------------------------------------------------------|-----------|-------------------|-----------|-------------------|----------------|--------|------|
| Intensity of expression of cadherin in the jejunum, mean pixel intensity | 171 ± 3.3 | 172<br>(169; 176) | 143 ± 7.4 | 142<br>(133; 156) | Welch's t-test | <0.001 | 1.87 |
|--------------------------------------------------------------------------|-----------|-------------------|-----------|-------------------|----------------|--------|------|

**Table 2.** The histomorphometrical parameters of the enteric nervous plexuses in the duodenum and jejunum

|                                  |              |                      |              |                      |                       |       |  |
|----------------------------------|--------------|----------------------|--------------|----------------------|-----------------------|-------|--|
| <i>Auerbach plexus, duodenum</i> |              |                      |              |                      |                       |       |  |
| Area, µm <sup>2</sup>            | 828 ± 58.4   | 784<br>(726; 951)    | 656 ± 63.3   | 628<br>(519; 748)    | Student's<br>t-test   | 0.074 |  |
| Perimeter, µm                    | 137 ± 27.3   | 140<br>(123; 167)    | 131 ± 15.1   | 130<br>(94; 156)     | Mann-<br>Whitney test | 0.689 |  |
| Mean Feret diameter, µm          | 41.0 ± 13.63 | 28.1<br>(21.9; 48.7) | 39.3 ± 16.70 | 22.2<br>(8.7; 84.2)  | Mann-<br>Whitney test | 0.471 |  |
| Mean diameter, µm                | 25.4 ± 4.16  | 28.5<br>(23.5; 30.4) | 20.3 ± 3.80  | 23.4<br>(13.9; 25.2) | Student's<br>t-test   | 0.387 |  |
| Min diameter, µm                 | 15.9 ± 1.88  | 15.9<br>(13.2; 16.7) | 11.8 ± 1.47  | 12.6<br>(7.7; 14.7)  | Student's<br>t-test   | 0.116 |  |
| Sphericity                       | 0.31 ± 0.077 | 0.23<br>(0.16; 0.46) | 0.30 ± 0.090 | 0.22<br>(0.17; 0.56) | Student's<br>t-test   | 0.934 |  |
| The number of the ganglia, /mm   | 5.5 ± 0.37   | 5.3<br>(5.0; 6.5)    | 5.6 ± 0.49   | 5.5<br>(4.5; 6.0)    | Student's<br>t-test   | 0.874 |  |

| <i>Meissner plexus, duodenum</i>   |                  |                      |                  |                      |                       |        |      |
|------------------------------------|------------------|----------------------|------------------|----------------------|-----------------------|--------|------|
| Area, $\mu\text{m}^2$              | 384 $\pm$ 46.5   | 403<br>(287; 467)    | 372 $\pm$ 58.0   | 349<br>(316; 512)    | Student's<br>t-test   | 0.875  |      |
| Perimeter, $\mu\text{m}$           | 82 $\pm$ 10.2    | 78<br>(60; 105)      | 80 $\pm$ 13.1    | 91<br>(48; 105)      | Student's<br>t-test   | 0.906  |      |
| Mean Feret diameter, $\mu\text{m}$ | 24.6 $\pm$ 3.02  | 25.7<br>(16.7; 31.5) | 24.5 $\pm$ 3.87  | 25.3<br>(17.4; 28.4) | Mann-<br>Whitney test | 0.936  |      |
| Mean diameter, $\mu\text{m}$       | 20.8 $\pm$ 2.57  | 21.8<br>(18.8; 25.8) | 20.1 $\pm$ 2.53  | 18.4<br>(17.2; 22.4) | Student's<br>t-test   | 0.851  |      |
| Min diameter, $\mu\text{m}$        | 14.6 $\pm$ 2.00  | 14.2<br>(11.2; 19.5) | 14.2 $\pm$ 1.80  | 14.9<br>(12.4; 16.6) | Student's<br>t-test   | 0.885  |      |
| Sphericity                         | 0.29 $\pm$ 0.077 | 0.28<br>(0.16; 0.46) | 0.31 $\pm$ 0.020 | 0.31<br>(0.29; 0.36) | Welch's t-test        | 0.812  |      |
| The number of the ganglia, /mm     | 1.5 $\pm$ 0.08   | 1.5<br>(1.3; 1.6)    | 4.4 $\pm$ 0.33   | 4.3<br>(4.0; 4.6)    | Student's<br>t-test   | <0.001 | 4.54 |
| <i>Auerbach plexus, jejunum</i>    |                  |                      |                  |                      |                       |        |      |
| Area, $\mu\text{m}^2$              | 585 $\pm$ 51.0   | 564<br>(487; 675)    | 979 $\pm$ 60.8   | 1022<br>(820; 111)   | Student's<br>t-test   | <0.001 | 2.62 |
| Perimeter, $\mu\text{m}$           | 120 $\pm$ 22.5   | 105<br>(78; 176)     | 179 $\pm$ 30.2   | 194<br>(152; 236)    | Mann-<br>Whitney test | 0.173  |      |
| Mean Feret diameter, $\mu\text{m}$ | 36.2 $\pm$ 3.88  | 36.2<br>(28.1; 41.9) | 53.6 $\pm$ 4.94  | 54.7<br>(46.8; 61.4) | Student's<br>t-test   | 0.020  | 1.46 |
| Mean diameter, $\mu\text{m}$       | 12.9 $\pm$ 2.65  | 12.7<br>(7.9; 19.3)  | 13.0 $\pm$ 2.08  | 11.3<br>(8.6; 18.4)  | Student's<br>t-test   | 0.977  |      |
| Min diameter, $\mu\text{m}$        | 21.9 $\pm$ 4.12  | 19.8<br>(14.0; 28.2) | 24.7 $\pm$ 5.02  | 30.1<br>(14.1; 34.1) | Student's<br>t-test   | 0.676  |      |
| Sphericity                         | 0.21 $\pm$ 0.077 | 0.17<br>(0.05; 0.31) | 0.13 $\pm$ 0.045 | 0.12<br>(0.04; 0.15) | Mann-<br>Whitney test | 0.472  |      |
| The number of the ganglia, /mm     | 3.0 $\pm$ 0.45   | 3.0<br>(2.1; 3.6)    | 3.1 $\pm$ 0.24   | 3.2<br>(3.0; 3.5)    | Welch's t-test        | 0.850  |      |
| <i>Meissner plexus, jejunum</i>    |                  |                      |                  |                      |                       |        |      |

|                                    |                  |                      |                  |                      |                       |       |  |
|------------------------------------|------------------|----------------------|------------------|----------------------|-----------------------|-------|--|
| Area, $\mu\text{m}^2$              | $355 \pm 42.0$   | 385<br>(246; 445)    | $375 \pm 64.5$   | 397<br>(297; 480)    | Student's<br>t-test   | 0.830 |  |
| Perimeter, $\mu\text{m}$           | $80 \pm 9.0$     | 81<br>(63; 97)       | $79 \pm 13.9$    | 90<br>(43; 95)       | Student's<br>t-test   | 0.953 |  |
| Mean Feret diameter, $\mu\text{m}$ | $24.0 \pm 2.74$  | 25.9<br>(20.0; 29.3) | $23.9 \pm 4.16$  | 24.5<br>(15.4; 32.1) | Student's<br>t-test   | 0.984 |  |
| Mean diameter, $\mu\text{m}$       | $19.3 \pm 2.29$  | 17.6<br>(15.6; 20.3) | $19.4 \pm 2.94$  | 20.7<br>(11.3; 24.1) | Mann-<br>Whitney test | 0.810 |  |
| Min diameter, $\mu\text{m}$        | $12.8 \pm 1.84$  | 12.4<br>(8.79; 16.7) | $13.7 \pm 2.16$  | 13.5<br>(12.3; 14.8) | Student's<br>t-test   | 0.758 |  |
| Sphericity                         | $0.31 \pm 0.073$ | 0.28<br>(0.20; 0.46) | $0.33 \pm 0.073$ | 0.30<br>(0.13; 0.49) | Student's<br>t-test   | 0.874 |  |
| The number of the ganglia, /mm     | $3.8 \pm 0.37$   | 3.7<br>(3.1; 4.7)    | $3.9 \pm 0.04$   | 3.9<br>(3.8; 3.9)    | Welch's t-test        | 0.797 |  |

**Table 3.** The histomorphometrical parameters of the liver

|                                                         |                 |                      |                 |                      |                       |        |      |
|---------------------------------------------------------|-----------------|----------------------|-----------------|----------------------|-----------------------|--------|------|
| Total cell number, / $\text{mm}^2$                      | $2084 \pm 77.2$ | 2038<br>(1985; 2152) | $2647 \pm 56.3$ | 2645<br>(2546; 2721) | Student's<br>t-test   | <0.001 | 3.22 |
| Total hepatocyte number, / $\text{mm}^2$                | $1565 \pm 30.6$ | 1561<br>(1506; 1624) | $2149 \pm 22.5$ | 2150<br>(2100; 2176) | Student's<br>t-test   | <0.001 | 8.11 |
| Total hepatocyte nucleus numer, / $\text{mm}^2$         | $1651 \pm 26.5$ | 1652<br>(1628; 1664) | $2257 \pm 25.3$ | 2246<br>(2201; 2302) | Student's<br>t-test   | <0.001 | 8.71 |
| Mononuclear hepatocytes nucleus number, / $\text{mm}^2$ | $1479 \pm 48.6$ | 1457<br>(1386; 1607) | $2041 \pm 64.1$ | 2026<br>(1942; 2071) | Student's<br>t-test   | <0.001 | 3.68 |
| Binuclear hepatocytes nucleus number, / $\text{mm}^2$   | $86 \pm 11.4$   | 90<br>(65; 105)      | $108 \pm 11.8$  | 109<br>(97; 128)     | Student's<br>t-test   | 0.211  |      |
| Non-hepatocyte cells number, / $\text{mm}^2$            | $519 \pm 40.4$  | 552<br>(499; 588)    | $488 \pm 20.8$  | 460<br>(452; 538)    | Mann-<br>Whitney test | 0.230  |      |
| Immature collagen, %                                    | $15.8 \pm 1.84$ | 16.2<br>(11.9; 19.7) | $39.8 \pm 2.16$ | 41.0<br>(37.1; 42.9) | Student's<br>t-test   | <0.001 | 4.46 |

**Figure 5.** Immunohistochemical reactions for nesfatin-1 in the jejunal crypts and Auerbach plexus

|                                                                                |               |                   |               |                   |                     |        |      |
|--------------------------------------------------------------------------------|---------------|-------------------|---------------|-------------------|---------------------|--------|------|
| The intensity of expression of nesfatin-1 in the jejunum, mean pixel intensity | $199 \pm 2.9$ | 200<br>(190; 204) | $246 \pm 1.6$ | 248<br>(242; 249) | Student's<br>t-test | <0.001 | 7.44 |
|--------------------------------------------------------------------------------|---------------|-------------------|---------------|-------------------|---------------------|--------|------|

**Figure 5.** Immunohistochemical reactions for ZO-1 in jejunum and duodenum

|                                                                                       |           |                   |           |                   |                   |        |      |
|---------------------------------------------------------------------------------------|-----------|-------------------|-----------|-------------------|-------------------|--------|------|
| The intensity of expression of ZO-1 in the jejunum, mean pixel intensity              | 167 ± 3.7 | 171<br>(155; 174) | 129 ± 3.8 | 126<br>(122; 136) | Mann-Whitney test | <0.001 | 4.00 |
| The intensity of expression of ZO-1 in the duodenum, mean pixel intensity             | 171 ± 3.3 | 172<br>(168; 178) | 143 ± 3.5 | 146<br>(137; 147) | Student's t-test  | <0.001 | 3.20 |
| The intensity of expression of ZO-1 in the duodenal villi, mean pixel intensity       | 158 ± 3.7 | 157<br>(154; 167) | 135 ± 3.3 | 134<br>(129; 136) | Student's t-test  | <0.001 | 2.45 |
| <b>Figure 7. Immunohistochemical reactions for occludin in jejunum and duodenum</b>   |           |                   |           |                   |                   |        |      |
| The intensity of expression of occludin in the jejunum, mean pixel intensity          | 133 ± 4.5 | 133<br>(127; 140) | 159 ± 5.7 | 161<br>(150; 167) | Student's t-test  | 0.004  | 1.89 |
| The intensity of expression of occludin in the duodenum, mean pixel intensity         | 167 ± 4.2 | 168<br>(159; 174) | 171 ± 5.1 | 174<br>(161; 180) | Student's t-test  | 0.558  |      |
| The intensity of expression of occludin in the duodenal villi, mean pixel intensity   | 149 ± 6.6 | 150<br>(135; 162) | 110 ± 7.5 | 105<br>(96; 114)  | Student's t-test  | <0.001 | 2.06 |
| <b>Figure 8. Immunohistochemical reactions for marvelD3 in jejunum and duodenum</b>   |           |                   |           |                   |                   |        |      |
| The intensity of expression of marvelD3 in the jejunum, mean pixel intensity          | 182 ± 5.5 | 183<br>(180; 190) | 185 ± 6.3 | 183<br>(178; 200) | Student's t-test  | 0.726  |      |
| The intensity of expression of marvelD3 in the duodenum, mean pixel intensity         | 173 ± 3.0 | 176<br>(170; 177) | 189 ± 2.7 | 189<br>(185; 194) | Student's t-test  | 0.003  | 2.09 |
| The intensity of expression of marvelD3 in the duodenal villi, mean pixel intensity   | 158 ± 6.5 | 163<br>(158; 167) | 137 ± 3.2 | 139<br>(134; 143) | Mann-Whitney test | 0.045  | 0.58 |
| <b>Figure 9. Immunohistochemical reactions for ghrelin in jejunum and duodenum</b>    |           |                   |           |                   |                   |        |      |
| The intensity of expression of ghrelin in the jejunum, mean pixel intensity           | 152 ± 4.2 | 150<br>(142; 164) | 176 ± 2.9 | 177<br>(169; 182) | Student's t-test  | <0.001 | 2.50 |
| The intensity of expression of ghrelin in the duodenum, mean pixel intensity          | 151 ± 5.1 | 153<br>(143; 161) | 147 ± 2.1 | 146<br>(143; 150) | Welch's t-test    | 0.496  |      |
| The intensity of expression of ghrelin in the duodenal Auerbach, mean pixel intensity | 164 ± 4.8 | 166<br>(161; 172) | 212 ± 9.2 | 216<br>(202; 231) | Student's t-test  | <0.001 | 2.39 |
| <b>Figure 10. Immunohistochemical reactions for leptin in jejunum and duodenum</b>    |           |                   |           |                   |                   |        |      |
| The intensity of expression of ghrelin in the jejunum, mean pixel intensity           | 161 ± 5.1 | 163<br>(156; 171) | 165 ± 6.6 | 163<br>(152; 176) | Student's t-test  | 0.649  |      |
| The intensity of expression of ghrelin in the jejunal crypts, mean pixel intensity    | 164 ± 2.5 | 162<br>(160; 169) | 167 ± 6.0 | 165<br>(154; 179) | Welch's t-test    | 0.745  |      |



|                                                                                                      |            |                   |           |                   |                  |        |      |
|------------------------------------------------------------------------------------------------------|------------|-------------------|-----------|-------------------|------------------|--------|------|
| The intensity of expression of ghrelin in the duodenum, mean pixel intensity                         | 140 ± 3.3  | 138<br>(137; 142) | 167 ± 4.7 | 165<br>(156; 178) | Student's t-test | <0.001 | 2.42 |
| The intensity of expression of ghrelin in the duodenal Auerbach, mean pixel intensity                | 159 ± 7.9  | 159<br>(152; 167) | 198 ± 2.5 | 200<br>(191; 202) | Welch's t-test   | <0.001 | 2.43 |
| <b>Figure 11. Immunohistochemical reactions for VIP in Auerbach plexuses of duodenum and jejunum</b> |            |                   |           |                   |                  |        |      |
| The intensity of expression of ghrelin in the duodenal Auerbach, mean pixel intensity                | 135 ± 12.3 | 145<br>(115; 149) | 178 ± 4.4 | 180<br>(167; 184) | Welch's t-test   | 0.004  | 1.73 |
| The intensity of expression of ghrelin in the jejunal Auerbach, mean pixel intensity                 | 156 ± 4.9  | 163<br>(156; 170) | 189 ± 1.3 | 189<br>(187; 190) | Student's t-test | 0.001  | 2.40 |
